# Supplementary material for: A novel approach to identify driver genes involved in androgen-independent prostate cancer
Source: Mol Cancer. 2014 May 23;13:120. doi: 10.1186/1476-4598-13-120 (PMC4098713; doi:10.1186/1476-4598-13-120)

# Supplemental Figure S5. Screening of pGIPZ knockdown vectors for ATPAF1 and PTRF and confirmation of knockdown by RT-PCR

## S5A. Screen for effective shRNAs

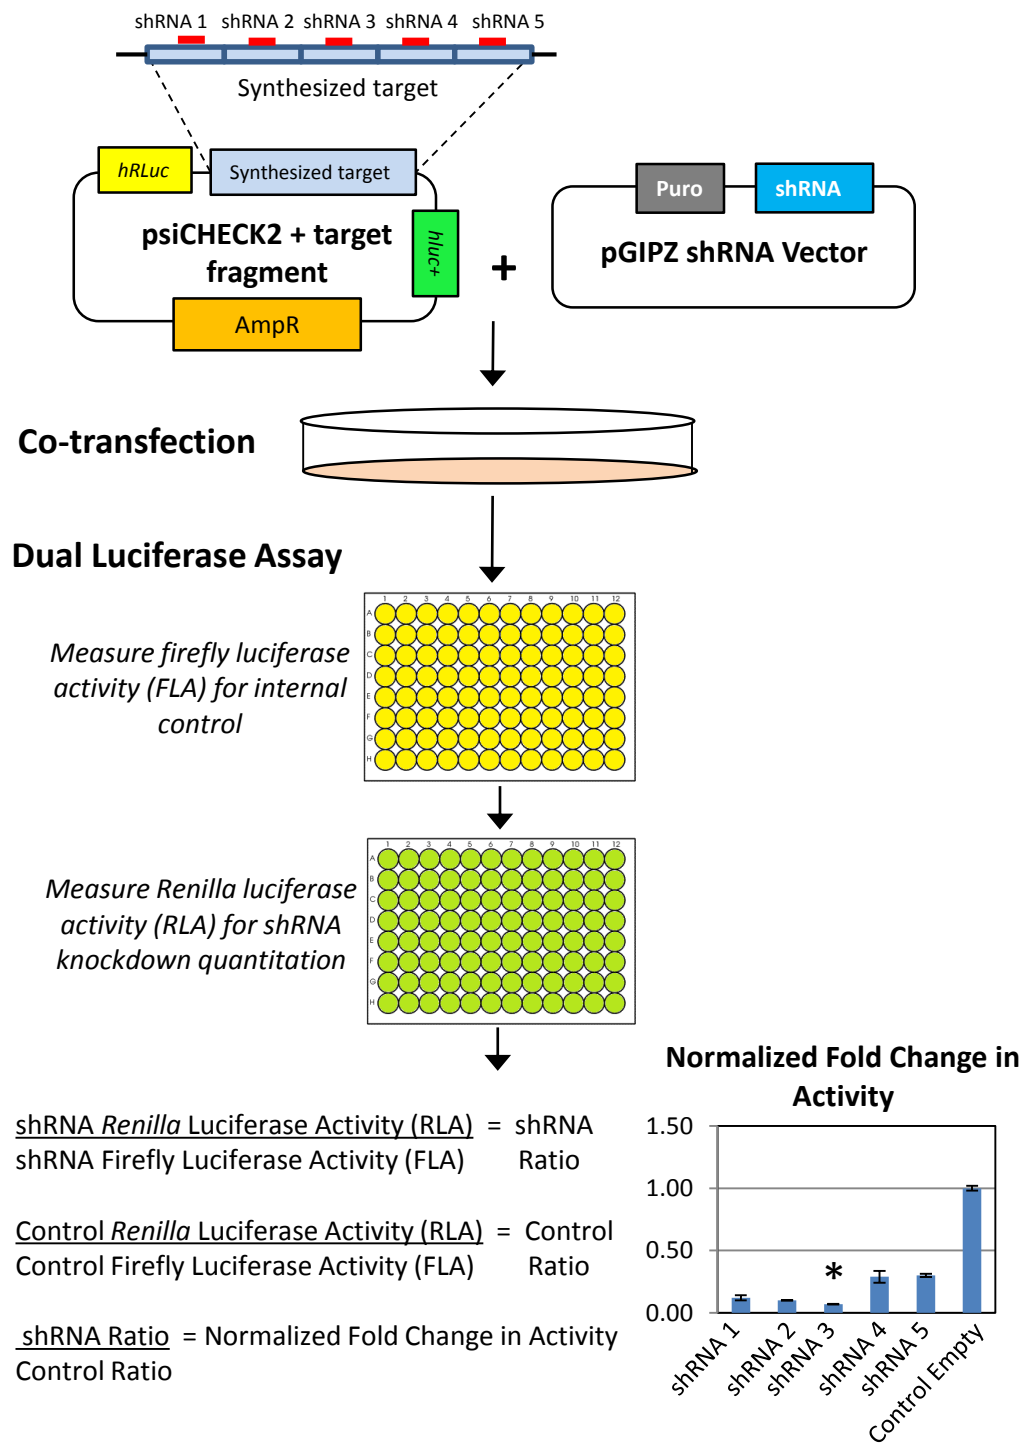

Supplemental Figure S5. Continued

S5B. Relative knockdown by each shRNA

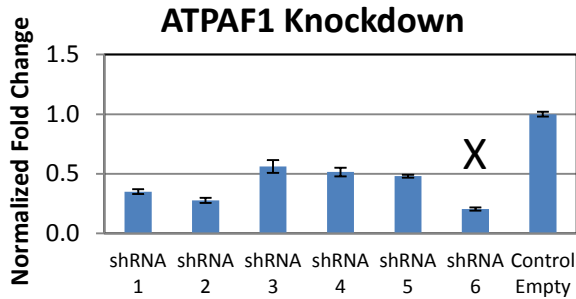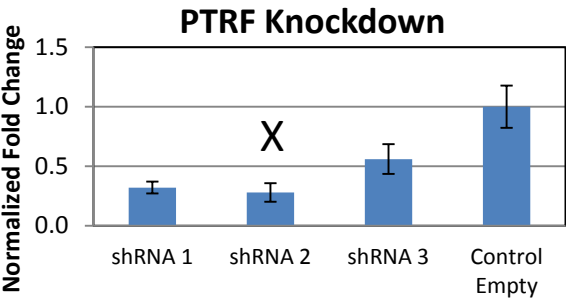

| Gene   | shRNA # | Clone ID     | shRNA used: |
|--------|---------|--------------|-------------|
| ATPAF1 | shRNA 1 | V3LHS_344342 |             |
|        | shRNA 2 | V3LHS_344340 |             |
|        | shRNA 3 | V3LHS_402694 |             |
|        | shRNA 4 | V3LHS_344343 |             |
|        | shRNA 5 | V3LHS_344341 |             |
|        | shRNA 6 | V3LMM_507960 | X           |
| PTRF   | shRNA 1 | V3LHS_303433 |             |
|        | shRNA 2 | V3LHS_303432 | X           |
|        | shRNA 3 | V3LMM_502146 |             |

**S5C. Confirmation of knockdown by RT-PCR.** LNCaP cells were transduced with lentiviruses carrying either empty vector (EV) or gene specific shRNA sequence (shATPAF1 or shPTRF). Total RNA isolated from the stably transduced LNCaP cells were subjected to reverse transcription -PCR analysis using gene specific primers, ATPAF1, PTRF and GAPDH. Top panel represents ATPAF1 level in LNCaP cells transduced with EV and shATPAF1. Bottom panel represents PTRF levels in LNCaP cells transduced with EV and shPTRF. GAPDH was used as loading control for normalization.

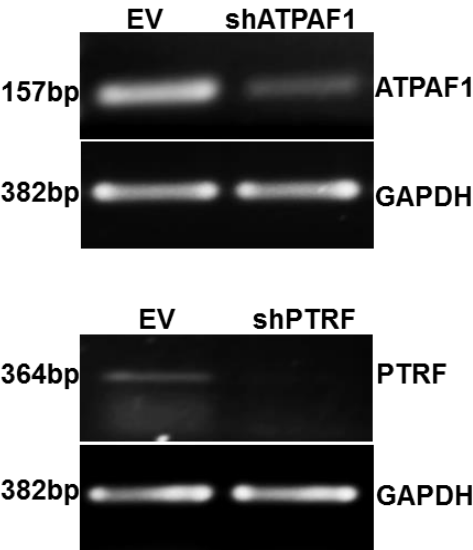

Supplement: Additional file 7: Figure S5 — Screening of pGIPZ knockdown vectors for ATPAF1 and PTRF and confirmation of knockdown by RT-PCR. [file 1476-4598-13-120-S7.pdf]
